# Supplementary material for: Laser capture microdissection for transcriptomic profiles in human skin biopsies
Source: PubMed Central journal article supplement (PMC6009967; doi:10.1186/s12867-018-0108-5), 2018-06-19

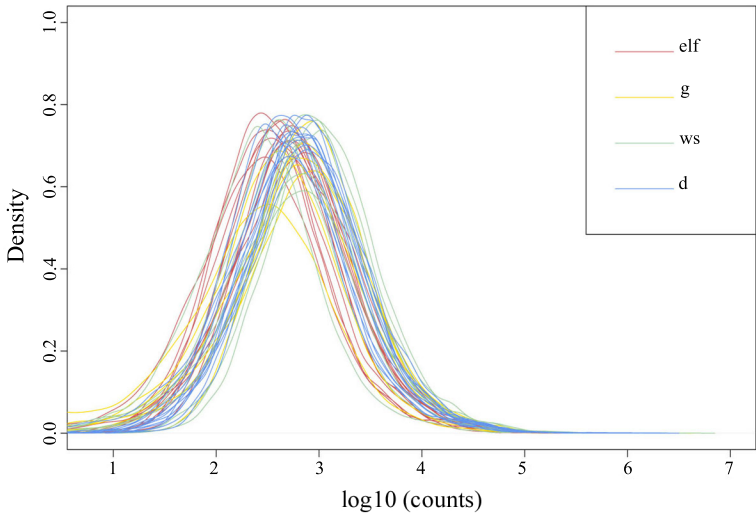

Supplement: 12867_2018_108_MOESM3_ESM.pdf [file 12867_2018_108_MOESM3_ESM.pdf]
